# Supplementary material
Source: Springer Nature journal article supplement (https://www.springermedizin.de/resource/supplementary/12963_2011_150_MOESM2_ESM.pdf/9572770)

**A**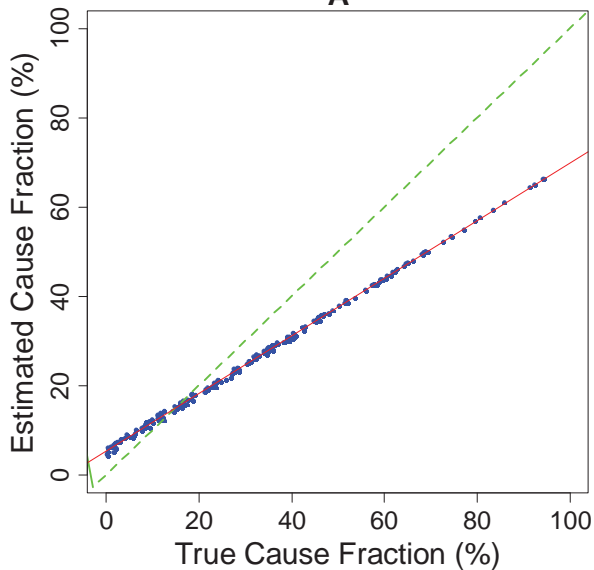**B**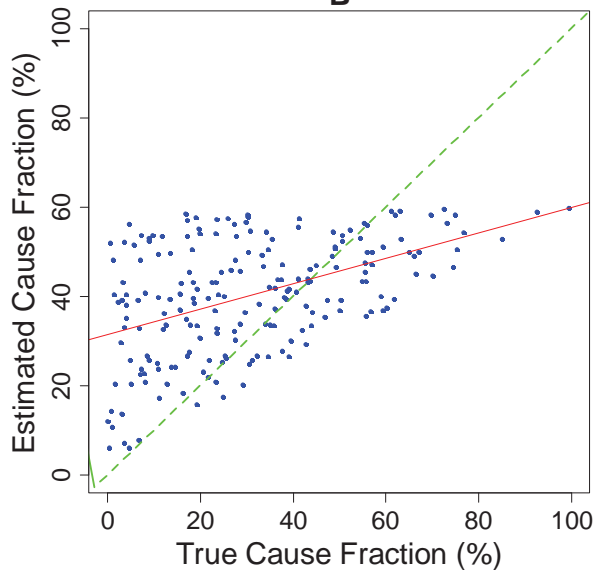**C**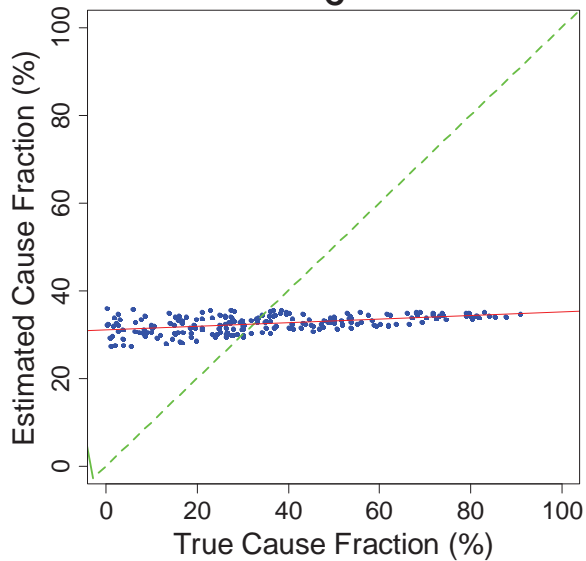

Supplement: MOESM2 [file 9572770]
